# Supplementary material
Source: publisher figshare collection journal article supplement (https://acs.figshare.com/ndownloader/files/3603678)

## **Fluorescence as a Probe of (-)-Epigallocatechin Gallate-Serum Albumin Interactions**

### **Supplemental Information**

Min Li and Ann E. Hagerman\*

Department of Chemistry & Biochemistry, Miami University, Oxford, OH 45056

\*Corresponding author. [hagermae@miamioh.edu](mailto:hagermae@miamioh.edu), 513-529-2827 (voice) 513-529-5715 (FAX)

### Captions for Supplemental Figures

Supplemental Figure 1. Quenching of 3  $\mu\text{M}$  BSA by MG. All fluorescence intensities were corrected by equation 1 with a  $\lambda_{\text{ex}} = 280 \text{ nm}$  and a  $\lambda_{\text{em}} = 350 \text{ nm}$ , and the concentrations of MG were 0, 5, 10, 15, 20 and 25  $\mu\text{M}$ . Changes in the emission spectra of BSA were measured at (a) pH 3.0, (b) pH 5.0, and (c) pH 7.4. (d) The efficiencies of quenching were compared at pH 3.0 (●), 5.0 (■), and 7.4 (▲) by plotting the relative fluorescence intensity ( $F/F_0 \cdot 100$ ) against EGCg concentration.

Supplemental Figure 2. Quenching of 3  $\mu\text{M}$  BSA by EGC. All fluorescence intensities were corrected by equation 1 with a  $\lambda_{\text{ex}} = 280 \text{ nm}$  and a  $\lambda_{\text{em}} = 350 \text{ nm}$ , and the concentrations of EGC were 0, 5, 10, 15, 20 and 25  $\mu\text{M}$ . Changes in the emission spectra of BSA were measured at (a) pH 3.0, (b) pH 5.0, and (c) pH 7.4. (d) The efficiencies of quenching were compared at pH 3.0 (●), 5.0 (■), and 7.4 (▲) by plotting the relative fluorescence intensity ( $F/F_0 \cdot 100$ ) against EGCg concentration.

Supplemental Figure 3. Competitive binding experiments between the drugs TB or PB and EGCg. BSA (30  $\mu\text{M}$ ) was incubated at pH 7.4 with EGCg (25  $\mu\text{M}$ ) and either PB or TB (0-900  $\mu\text{M}$ ) for 40 min at room temperature. EGCg-BSA binding was determined by assessing the BSA-induced stabilization of EGCg, and is expressed as a % of the amount bound in absence of inhibitor.

Supplemental Figure 1

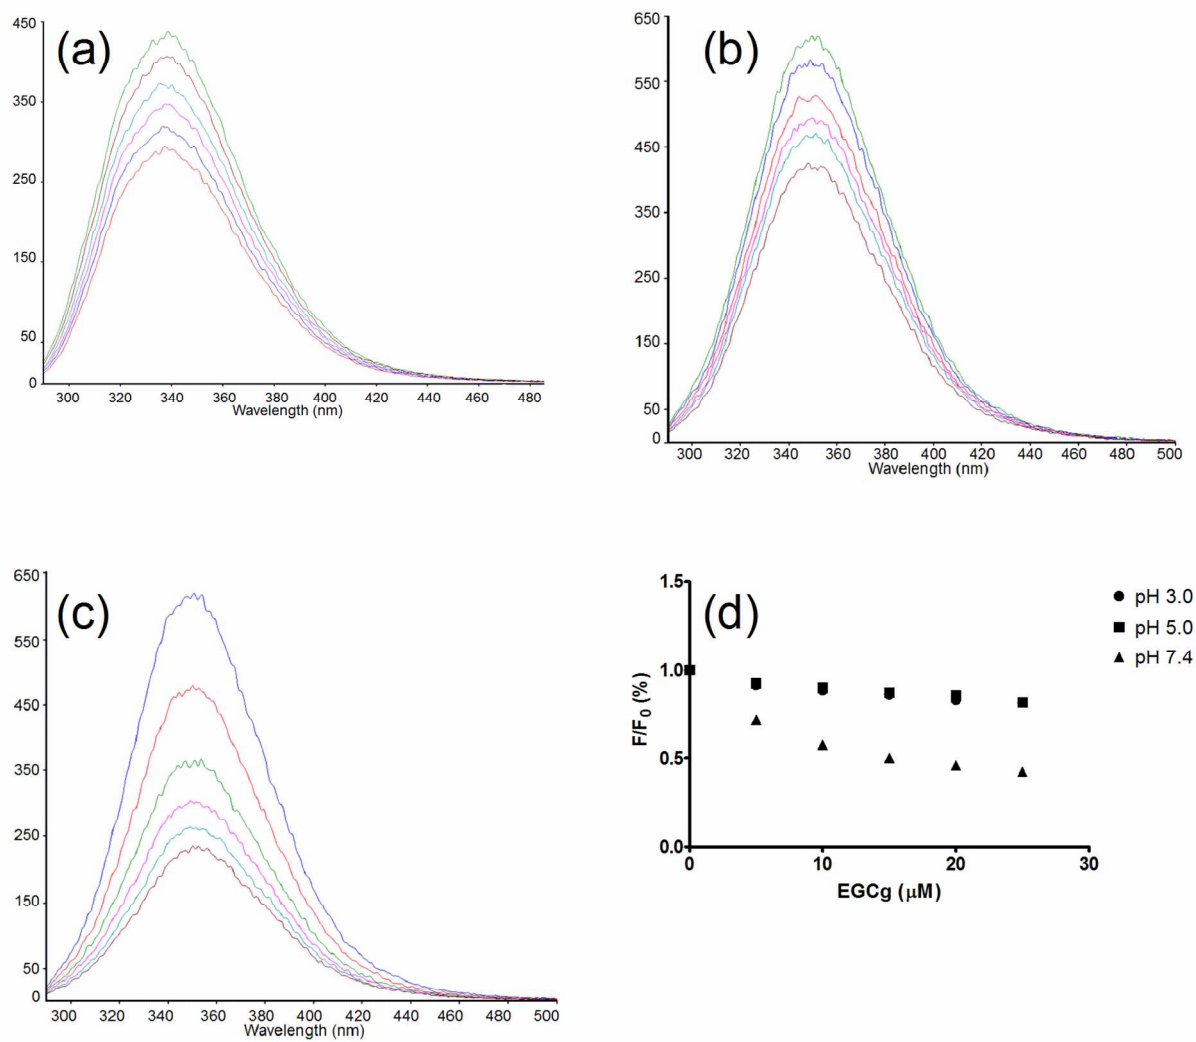

Supplemental Figure 2

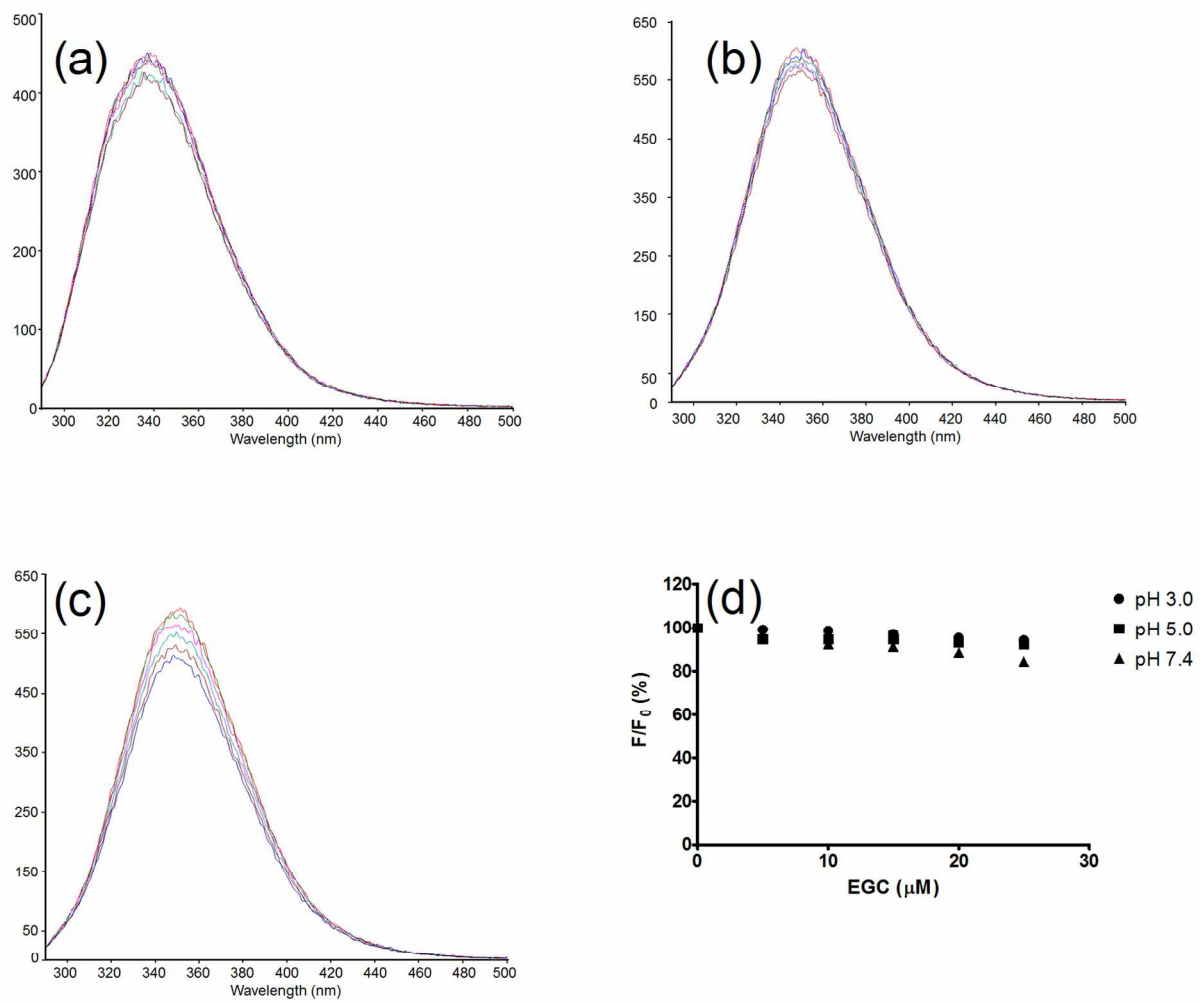

Supplemental Figure 3

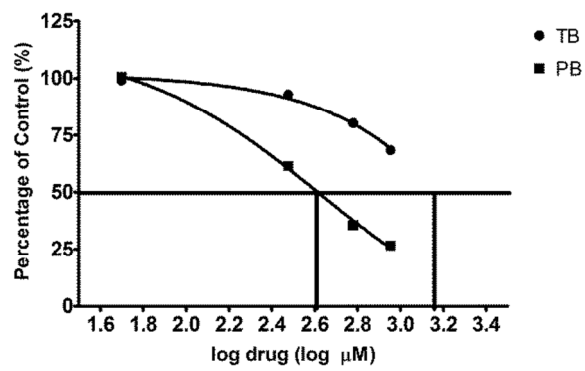

Supplement: Supplementary file 1 [file 3603678]
